# Supplementary material
Source: Springer Nature journal article supplement (https://www.springermedizin.de/resource/supplementary/12885_2012_3741_MOESM1_ESM.pdf/9464280)

**A**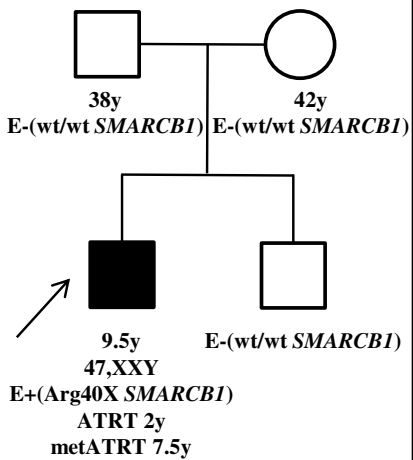**B**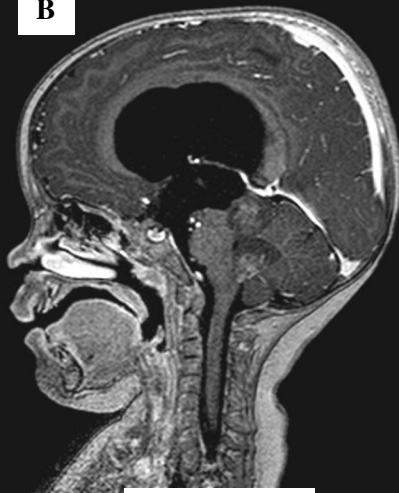**At diagnosis****C**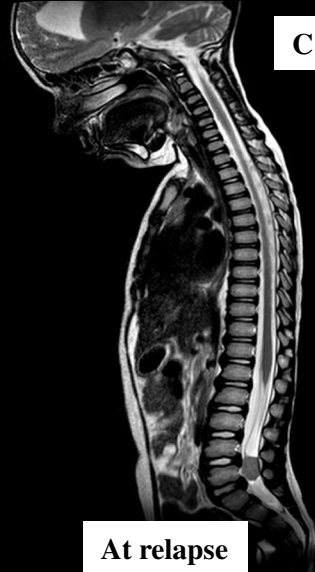**At relapse****D**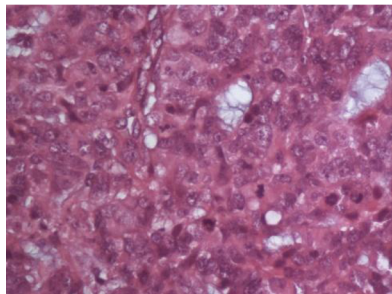**E**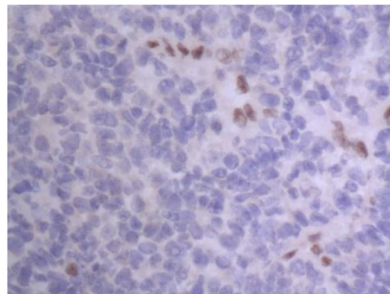

Supplement: MOESM1 [file 9464280]
